# Supplementary material
Source: PubMed Central journal article supplement (PMC5916780)
Supplement: NIHMS913682-supplement-Supp_info.pdf [file NIHMS913682-supplement-Supp_info.pdf]

**Lazar et al, Supplementary Information**

**Figure S1: Sequence alignment of the *bioQ* frameshift made via CRISPR. (A)** CRISPR-Cas9 was used to generate frameshift mutants in *bioQ pyc::tn*. Candidate *bioQ* sequences were sequenced and sequences were aligned to the native *bioQ* sequence (top). Identical nucleotides are shaded in gray, while nucleotides different from the reference sequence are not shaded. *bioQ* mutant #16 has a single nucleotide insertion of A at the DSB site **(B)** *pyc::tn bioQ* #16 restores *bioB* induction to *pyc::tn*. Error bars are standard deviation of three biological replicates.

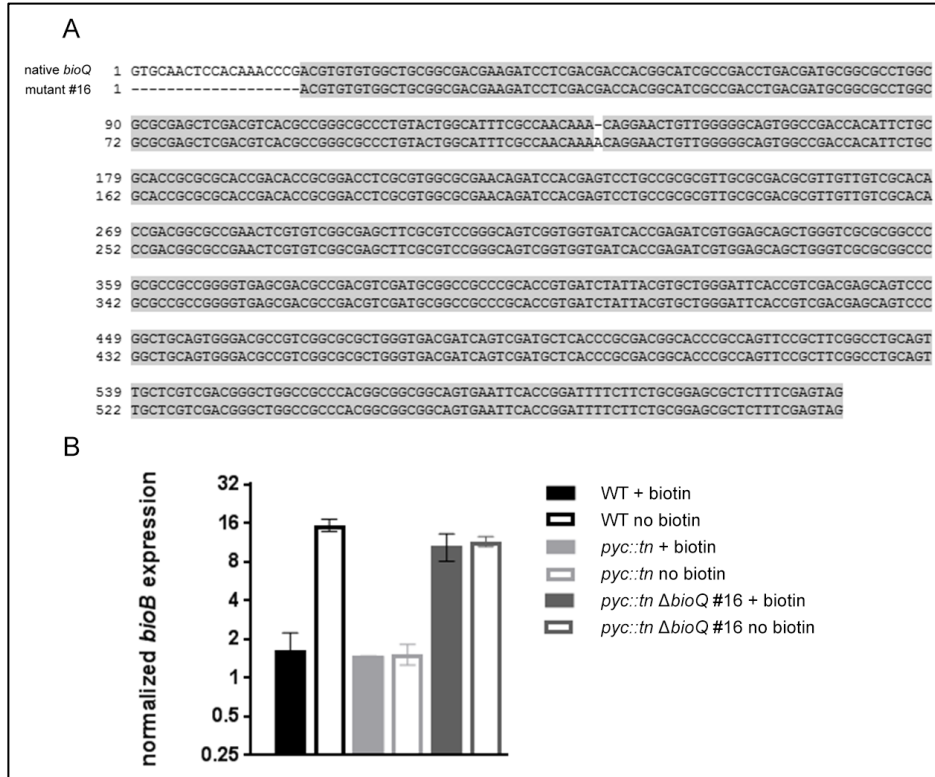

**Figure S2. Primary amino acid sequence alignment of pyruvate carboxylases Rv2967c (*M. tuberculosis*) and MSMEG\_2412 and 6648 (*M. smegmatis*).** Sequence alignment was performed using the Clustal Omega web form (McWilliam *et al.*, 2013, Sievers *et al.*, 2011). Domains were identified by homology to the *R. etli* pyruvate carboxylase (St Maurice *et al.*, 2007). The biotin carboxylase (BC) domain is highlighted with a red line above the primary sequence, carboxytransferase (CT) with a blue line, and the biotin-binding (BCCP) with a green line. Biotin carboxylase catalytic residues (red arrows) were identified via homology with the *E. coli* biotin carboxylase, (Janiyani *et al.*, 2001) carboxytransferase catalytic residues (blue arrows) were identified via homology with the *S. aureus* pyruvate carboxylase (Yu *et al.*, 2009), and the biotin attachment residue (green arrow) was identified via the CDD database (Marchler-Bauer *et al.*, 2017). Transposon insertion sites are noted with black arrows and annotated with the strain number.

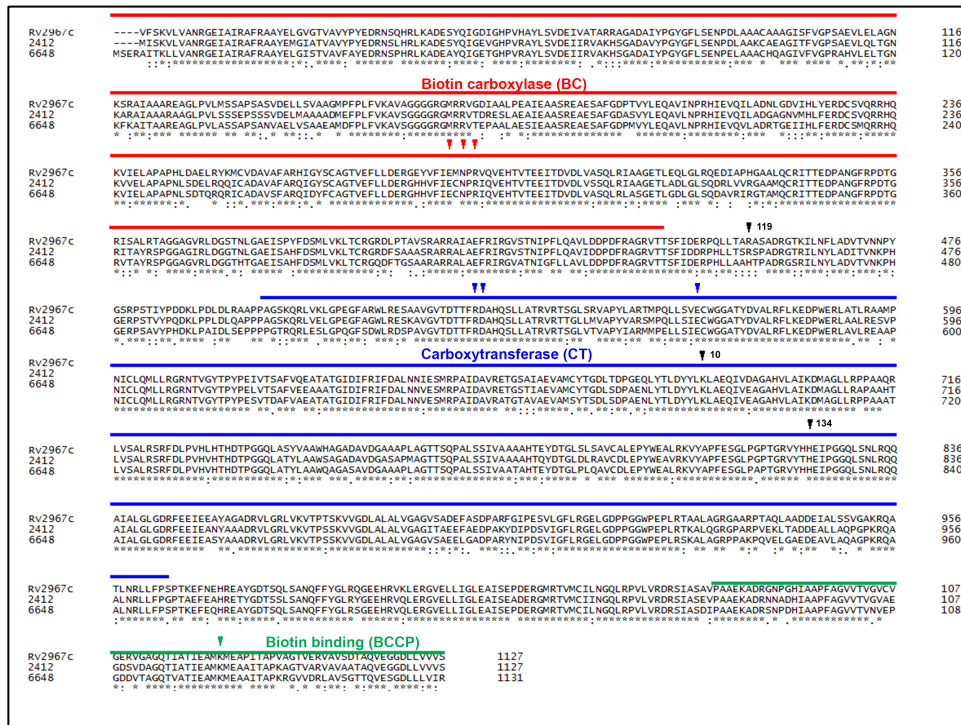





**Table S1: Oligonucleotides used in this study**

| <b>Name</b> | <b>Sequence</b>          | <b>Relevant Features</b>                                   |
|-------------|--------------------------|------------------------------------------------------------|
| oNZL003     | GCCTTCTTGACGAGTTCTTCTGAG | sequencing of transposon insertions (F direction)          |
| oNZL004     | CCGAGATAGGGTTGAGTGTGTTTC | sequencing of transposon insertions (R direction)          |
| oCrBioQ-1F  | CACCCTGGCATTTCGCCAACAAAC | crRNA deletion of <i>bioQ</i>                              |
| oCrBioQ-1R  | AAACGTTTGTGGCGAAATGCCAG  | crRNA deletion of <i>bioQ</i>                              |
| oCrBioQ-2F  | CACCGAGATCGTGGAGCAGC     | crRNA deletion of <i>bioQ</i>                              |
| oCrBioQ-2R  | AAACGCTGCTCCACGATCTCGGTG | crRNA deletion of <i>bioQ</i>                              |
| oBioF-F     | CACCCGACATCGTGATGAC      | primer for qPCR amplification of <i>bioF</i> (F direction) |
| oBioF-R     | CGGTGTCGAAGATGAAC        | primer for qPCR amplification of <i>bioF</i> (R direction) |
| oBioF-taq   | CACGACGCTGTGCAAAGCACTG   | taqMan probe for qPCR quantitation of <i>bioF</i>          |
| oBioA-F     | CTGGACACGGTGTCTTC        | primer for qPCR amplification of <i>bioA</i> (F direction) |
| oBioA-R     | TCATCAACCGGTGCTTGG       | primer for qPCR amplification of <i>bioA</i> (R direction) |
| oBioA-taq   | TGGAGGTCGCGGTGAAGATG     | taqMan probe for qPCR quantitation of <i>bioA</i>          |
| oBioD-F     | ACCGCATTGACCCTCGAAG      | primer for qPCR amplification of <i>bioD</i> (F direction) |
| oBioD-R     | ATCCAGTCTGCGTCAAAC       | primer for qPCR amplification of <i>bioD</i> (R direction) |
| oBioD-taq   | CGAACGCTTCGAGGCGTTGAG    | taqMan probe for qPCR quantitation of <i>bioD</i>          |
| oBioB-F     | CATCATCAGCCTCAAGAC       | primer for qPCR amplification of <i>bioB</i> (F direction) |
| oBioB-R     | TTCGGTGGCACCGGTCTTTG     | primer for qPCR amplification of <i>bioB</i> (R direction) |
| oBioB-taq   | TGCCACTTCTGCTCGCAGT      | taqMan probe for qPCR quantitation of <i>bioB</i>          |
| oSigA-F     | TGAGGTGACCGACGATCT       | primer for qPCR amplification of <i>sigA</i> (F direction) |
| oSigA-R     | GGCATCAGCTTCTTCTTCCT     | primer for qPCR amplification of <i>sigA</i> (R direction) |
| oSigA-taq   | AAGACACCGACCTGGAACCTCG   | taqMan probe for qPCR quantitation of <i>sigA</i>          |

**Table S2: Plasmids used in this study**

| <b>Name</b>   | <b>Relevant Features</b>                                                                                  |
|---------------|-----------------------------------------------------------------------------------------------------------|
| pMSG419       | TET-ON dependent expression vector with a polylinker for N-terminal HA fusions<br><i>hygR oriM oriE</i>   |
| pNZL035       | pMSG419 / MSMEG_2412                                                                                      |
| pNZL036       | pMSG419 / MSMEG_2413                                                                                      |
| pNZL037       | pMSG419 / MSMEG_2414                                                                                      |
| pNZL106       | TET-ON dependent expression vector with a polylinker for N-terminal HA fusions<br><i>strepR oriM oriE</i> |
| pNZL035.strep | pNZL106 / MSMEG_2412 (pyruvate carboxylase)                                                               |
| pNZL065       | pNZL106 / MSMEG_6648 (other annotated <i>M. smegmatis</i> pyruvate carboxylase)                           |
| pNZL070       | pNZL106 / Rv2967c ( <i>M. tuberculosis pyc</i> )                                                          |
| pNZL107       | pNZL106 / MSMEG_2412 biotin carboxylase (BC) domain (2412 residues 1-441)                                 |
| pNZL108       | pNZL106 / MSMEG_2412 carboxytransferase (CT) domain (2412 residues 498-965)                               |
| pNZL109       | pNZL106 / MSMEG_2412 CT + biotin binding (BCCP) domain (2412 residues 498-1128)                           |
| pNZL154       | pNZL106 / MSMEG_2412 E288K biotin carboxylase catalytic site mutant                                       |
| pNZL163       | pNZL106 / MSMEG_2412 K1093L biotin attachment site mutant                                                 |
| pNZL164       | pNZL106 / MSMEG_2412 K1093R biotin attachment site mutant                                                 |
| pNZL156       | pNZL106 / MSMEG_3188 (BioA)                                                                               |
| pNZL159       | pNZL106 / MSMEG_3194 (BioB)                                                                               |
| pAJF658       | TET-ON dependent expression vector with a DAS tag for Dual Control / hCas9<br><i>hygR oriE int attP</i>   |
| pAJF619       | tracrRNA parent plasmid <i>strepR oriE oriM</i>                                                           |
| pBioQ-1       | pAJF619 fused to oCrBioQ-1F/R via oligonucleotide ligation                                                |
| pBioQ-2       | pAJF619 fused to oCrBioQ-2F/R via oligonucleotide ligation                                                |

**Table S3: Strains used in this study**

| Strain number | Description                               | Genotype/Relevant Features                 | Reference             |
|---------------|-------------------------------------------|--------------------------------------------|-----------------------|
| MGM8000       | WT                                        | Wild Type <i>M. smegmatis</i> mc2155       | Laboratory collection |
| MGM8001       | m10                                       | Mc2155 <i>MSMEG_2412::tn</i>               | this work             |
| MGM8002       | m35                                       | Mc2155 <i>bioB::tn</i>                     | this work             |
| MGM8003       | m43                                       | Mc2155 <i>bioF::tn</i>                     | this work             |
| MGM8004       | m86                                       | Mc2155 <i>bioA::tn</i>                     | this work             |
| MGM8005       | m119                                      | Mc2155 <i>MSMEG_2412::tn</i>               | this work             |
| MGM8006       | m134                                      | Mc2155 <i>MSMEG_2412::tn</i>               | this work             |
| MGM8007       | WT + EV                                   | Mc2155 / pMSG419                           | this work             |
| MGM8008       | <i>pyc::tn</i> + EV                       | MGM8006 / pMSG419                          | this work             |
| MGM8009       | <i>bioA::tn</i> + EV                      | MGM8004 / pMSG419                          | this work             |
| MGM8010       | <i>bioB::tn</i> + EV                      | MGM8002 / pMSG419                          | this work             |
| MGM8011       | <i>pyc::tn</i> + pPyc                     | MGM8006 / pNZL035                          | this work             |
| MGM8012       | <i>pyc::tn</i> + p2413                    | MGM8006 / pNZL036                          | this work             |
| MGM8013       | <i>pyc::tn</i> + p2414                    | MGM8006 / pNZL037                          | this work             |
| MGM8019       | WT + EV                                   | Mc2155 / pNZL106                           | this work             |
| MGM8020       | <i>pyc::tn</i> + EV                       | MGM8006 / pNZL106                          | this work             |
| MGM8021       | <i>bioA::tn</i> + EV                      | MGM8004 / pNZL106                          | this work             |
| MGM8023       | <i>pyc::tn</i> + pPyc                     | MGM8006 / pNZL035.strep                    | this work             |
| MGM8024       | <i>pyc::tn</i> + p6648                    | MGM8006/ pNZL065                           | this work             |
| MGM8025       | <i>pyc::tn</i> + pRv2967c                 | MGM8006/ pNZL070                           | this work             |
| MGM8026       | <i>pyc::tn</i> + pPyc (BC domain)         | MGM8006 / pNZL107                          | this work             |
| MGM8027       | <i>pyc::tn</i> + pPyc (CT domain)         | MGM8006 / pNZL108                          | this work             |
| MGM8028       | <i>pyc::tn</i> + pPyc (CT + BCCP domains) | MGM8006 / pNZL109                          | this work             |
| MGM8029       | <i>pyc::tn</i> + pPyc-E288K               | MGM8006 / pNZL154                          | this work             |
| MGM8030       | <i>pyc::tn</i> + pPyc-K1093L              | MGM8006 / pNZL163                          | this work             |
| MGM8031       | <i>pyc::tn</i> + pPyc-K1093R              | MGM8006 / pNZL164                          | this work             |
| MGM8034       | <i>pyc::tn</i> + pBioA                    | MGM8006 / pNZL156                          | this work             |
| MGM8035       | <i>pyc::tn</i> + pBioB                    | MGM8006 / pNZL159                          | this work             |
| MGM8036       | <i>bioA::tn</i> + pBioA                   | MGM8004 / pNZL156                          | this work             |
| MGM8037       | <i>bioA::tn</i> + pBioB                   | MGM8004 / pNZL159                          | this work             |
| MGM8041       | <i>bioQ</i> mutant #16                    | MGM8006 <i>bioQ</i> frameshift 138-139 A   | this work             |
| MGM6514       | $\Delta$ <i>pyc</i>                       | Mc2155 $\Delta$ <i>MSMEG_2412</i> (1-3384) | this work             |
| MGM6516       | $\Delta$ <i>bioQ</i>                      | Mc2155 $\Delta$ <i>bioQ</i> (12-609)       | this work             |
| MGM6520       | <i>pyc::tn</i> / $\Delta$ <i>bioQ</i>     | MGM8006 <i>bioQ::hyg</i>                   | this work             |
| MGM6521       | $\Delta$ <i>pyc</i> + EV                  | MGM6514 / pNZL106                          | this work             |
| MGM6522       | $\Delta$ <i>pyc</i> + pNZL107             | MGM6514 / pNZL107                          | this work             |
| MGM6523       | $\Delta$ <i>pyc</i> + pNZL108             | MGM6514 / pNZL108                          | this work             |
| MGM6524       | $\Delta$ <i>pyc</i> + pNZL109             | MGM6514 / pNZL109                          | this work             |
| MGM6525       | $\Delta$ <i>pyc</i> + pNZL154             | MGM6514 / pNZL154                          | this work             |
| MGM6526       | $\Delta$ <i>pyc</i> + pNZL163             | MGM6514 / pNZL163                          | this work             |
| MGM6527       | $\Delta$ <i>pyc</i> + pNZL164             | MGM6514 / pNZL164                          | this work             |
| MGM6518       | <i>pyc::tn</i> + <i>B. subtilis</i> Pyc   | MGM8005/pAJF841                            | this work             |
